# Supplementary material for: Relationship between Resting State Heart Rate Variability and Sleep Quality in Older Adults with Mild Cognitive Impairment
Source: MDPI journal article supplement (doi:10.3390/ijerph182413321), 2021-12-17
Supplement: s1 [file s1]

**Table S1.** Characteristics and HRV data of naMCI and aMCI individuals (Mean  $\pm$  SD).

| Variables                  | naMCI (n = 25)    | aMCI (n = 18)      | p-value            | Effect size |
|----------------------------|-------------------|--------------------|--------------------|-------------|
| Age (years)                | 69.8 $\pm$ 5.8    | 67.9 $\pm$ 4.9     | 0.295 <sup>a</sup> | 0.348       |
| Male/female (n)            | 13/12             | 6/11               | 0.286 <sup>b</sup> | 0.334       |
| Height (cm)                | 171.36 $\pm$ 7.77 | 169.71 $\pm$ 10.34 | 0.557 <sup>a</sup> | 0.186       |
| Bodyweight (kg)            | 72.42 $\pm$ 8.68  | 73.48 $\pm$ 15.16  | 0.336 <sup>c</sup> | 0.048       |
| BMI (kg/m <sup>2</sup> )   | 25.28 $\pm$ 1.73  | 25.36 $\pm$ 3.44   | 0.931 <sup>a</sup> | 0.031       |
| Years of education (years) | 15.20 $\pm$ 2.27  | 15.39 $\pm$ 2.90   | 0.682 <sup>a</sup> | 0.075       |
| MMSE (score)               | 27.24 $\pm$ 1.13  | 27.24 $\pm$ 1.39   | 0.968 <sup>c</sup> | 0.000       |
| mHR (bpm)                  | 66.24 $\pm$ 10.55 | 68.33 $\pm$ 8.99   | 0.507 <sup>a</sup> | 0.210       |
| RMSSD (ms)                 | 23.58 $\pm$ 15.88 | 29.49 $\pm$ 15.37  | 0.170 <sup>c</sup> | 0.185       |
| HF nu                      | 47.47 $\pm$ 21.95 | 48.33 $\pm$ 20.82  | 0.899 <sup>a</sup> | 0.040       |
| D2                         | 0.43 $\pm$ 0.90   | 1.23 $\pm$ 1.68    | 0.405 <sup>c</sup> | 0.300       |

naMCI: nonamnestic mild cognitive impairments; aMCI: amnestic mild cognitive impairments; SD: standard deviation; HRV: heart rate variability; BMI: body mass index; MMSE: Mini Mental State Examination; mHR: mean heart rate; RMSSD: square root of the mean squared differences of successive NN intervals; HF nu: high frequency power in normalized units.

a Student's t-test; b Chi-squared test; c Mann-Whitney U-test.

**Table S2.** Mean global and component PSQI scores of naMCI and aMCI individuals (Mean  $\pm$  SD).

| Variables                | naMCI (n = 25)  | aMCI (n = 18)   | p-value | Effect size |
|--------------------------|-----------------|-----------------|---------|-------------|
| Subjective sleep quality | 1.64 $\pm$ 0.76 | 1.29 $\pm$ 0.69 | 0.180   | 0.233       |
| Sleep latency            | 1.04 $\pm$ 0.98 | 0.59 $\pm$ 0.94 | 0.099   | 0.227       |
| Sleep duration           | 0.36 $\pm$ 0.76 | 0.59 $\pm$ 0.87 | 0.309   | 0.141       |
| Sleep efficiency         | 0.44 $\pm$ 0.87 | 0.59 $\pm$ 0.87 | 0.405   | 0.086       |
| Sleep disturbance        | 1.44 $\pm$ 0.58 | 1.18 $\pm$ 0.39 | 0.085   | 0.249       |
| Sleep medication         | 0.16 $\pm$ 0.37 | 0.06 $\pm$ 0.24 | 0.326   | 0.152       |
| Sleep dysfunction        | 0.88 $\pm$ 0.78 | 0.71 $\pm$ 0.77 | 0.470   | 0.109       |
| Global score             | 5.96 $\pm$ 3.34 | 4.94 $\pm$ 2.84 | 0.401   | 0.160       |

PSQI: Pittsburgh Sleep Quality Index; naMCI: nonamnestic mild cognitive impairments; aMCI: amnestic mild cognitive impairments; SD: standard deviation.

Group differences were based on Mann-Whitney U-test.
